# Supplementary material for: Double-mesoporous core–shell nanosystems based on platinum nanoparticles functionalized with lanthanide complexes for in vivo magnetic resonance imaging and photothermal therapy
Source: Royal Society of Chemistry journal article supplement (doi:10.1039/c7nr04983h), 2017-01-01
Supplement: c7nr04983h1.pdf [file c7nr04983h1.pdf]

## Supporting information

### **Double-mesoporous Core-shell Nanosystems based on Platinum Nanoparticles Functionalized with Lanthanide Complexes for *In Vivo* Magnetic Resonance Imaging and Photothermal Therapy**

**Lei Zhao<sup>a</sup>, Xiaoqian Ge<sup>a</sup>, Guihua Yan<sup>b</sup>, Xiao Wang<sup>c</sup>, Pengfei Hu<sup>d</sup>, Liyi Shi<sup>a</sup>, Otto S. Wolfbeis<sup>e</sup>, Hongjie Zhang<sup>c</sup>, and Lining Sun<sup>\*a</sup>**

<sup>a</sup> *Research Center of Nano Science and Technology, School of Material Science and Engineering, Shanghai University, Shanghai 200444, China. [E-mail: lnsun@shu.edu.cn](mailto:lnsun@shu.edu.cn); Tel: +86-21-66137153*

<sup>b</sup> *Institute of Nanochemistry and Nanobiology, Shanghai University, Shanghai 200444, China.*

<sup>c</sup> *State Key Laboratory of Rare Earth Resource Utilization, Changchun Institute of Applied Chemistry, Chinese Academy of Sciences, Changchun 130022, China.*

<sup>d</sup> *Instrumental Analysis & Research Center, Shanghai University, Shanghai 200444, China.*

<sup>e</sup> *Institute of Analytical Chemistry, Chemo- and Biosensors, University of Regensburg, 93040 Regensburg, Germany.*

### Calculation of the photothermal conversion efficiency

As follows, the photothermal conversion efficiency ( $\eta$ ) of mPt@mSiO<sub>2</sub>-GdDTPA nanosystems was calculated according to the previous reported methods<sup>1</sup>.

$$\eta = \frac{hs(T_{max} - T_{max,H_2O})}{I(1 - 10^{-A_{808}})} \quad (1)$$

Where  $h$  is heat transfer coefficient,  $S$  is the surface area of the container,  $T_{max}$  is the equilibrium temperature of mPt@mSiO<sub>2</sub>-GdDTPA nanosystems,  $T_{max,H_2O}$  is the equilibrium temperature of water.  $I$  is the output power of 808 nm laser. And  $A_{808}$  is the absorption intensity of mPt@mSiO<sub>2</sub>-GdDTPA nanosystems at 808 nm. The value of  $hS$  is derived according to eq 2,3,4:

We introduced a system time constant  $\tau_s$  and a dimensionless term  $\theta$ , they were defined as:

$$\theta = \frac{T - T_{surr}}{(T_{max} - T_{surr})} \quad (2)$$

$$(3)$$

$$t = -\tau_s \ln \theta \quad (4)$$

$$\tau_s = \frac{\sum_i m_i C_{p,i}}{hs}$$

$hs$  can be calculated from equation 3 and the unit is mW/°C (with  $\tau_s = 188.53$  s,  $m = 0.44$  g,  $C = 4.2$  J/g). Substituting  $I = 1.5$  W,  $A_{808} = 0.30$ ,  $T_{max} - T_{max,H_2O} = 21.2$  °C to equation 1, the photothermal conversion efficiency ( $\eta$ ) of mPt@mSiO<sub>2</sub>-GdDTPA nanosystems was calculated to be 27%.

### References

1. X. Q. Ge, Z. M. Song, L. N. Sun, Y. F. Yang, L. Y. Shi, R. Si, W. Ren, X. E. Qiu,

and H. F. Wang, *Biomaterials*, 2016, **108**, 35-43.

2. X. Ding, C. H. Liow, M. Zhang, R. Huang, C. Li, H. Shen, M. Liu, Y. Zou, N. Gao, Z. Zhang, Y. Li, Q. Wang, S. Li, and J. Jiang, *J. Am. Chem. Soc.*, 2014, **136**, 15684–15693.

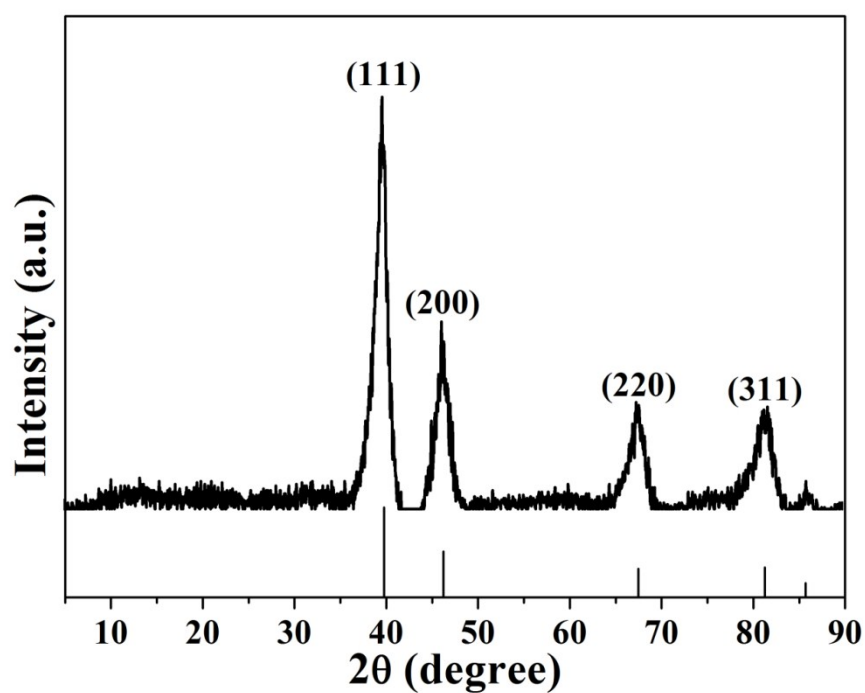

**Fig. S1.** X-ray diffraction pattern of mesoporous Pt nanoparticles (mPt NPs), and cubic phase JCPDS NO. 65-2868.

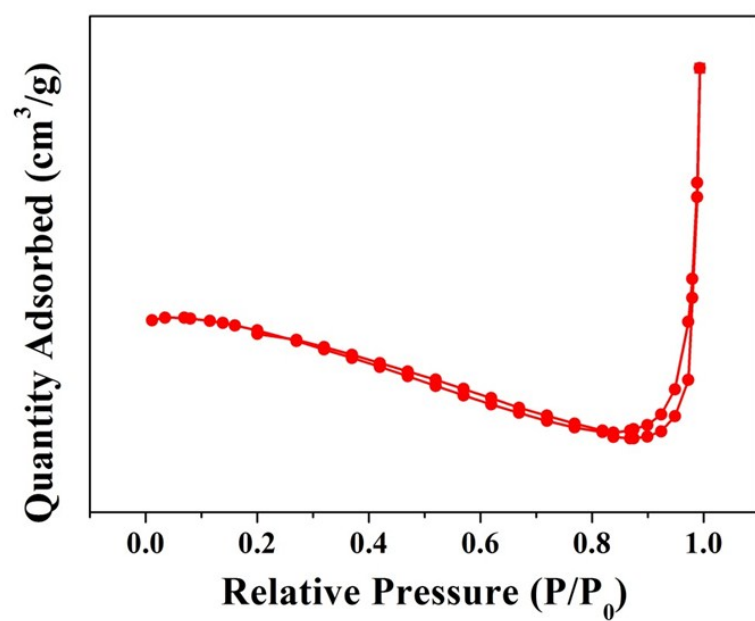

**Fig. S2.** N<sub>2</sub> adsorption/desorption isotherm of mPt NPs.

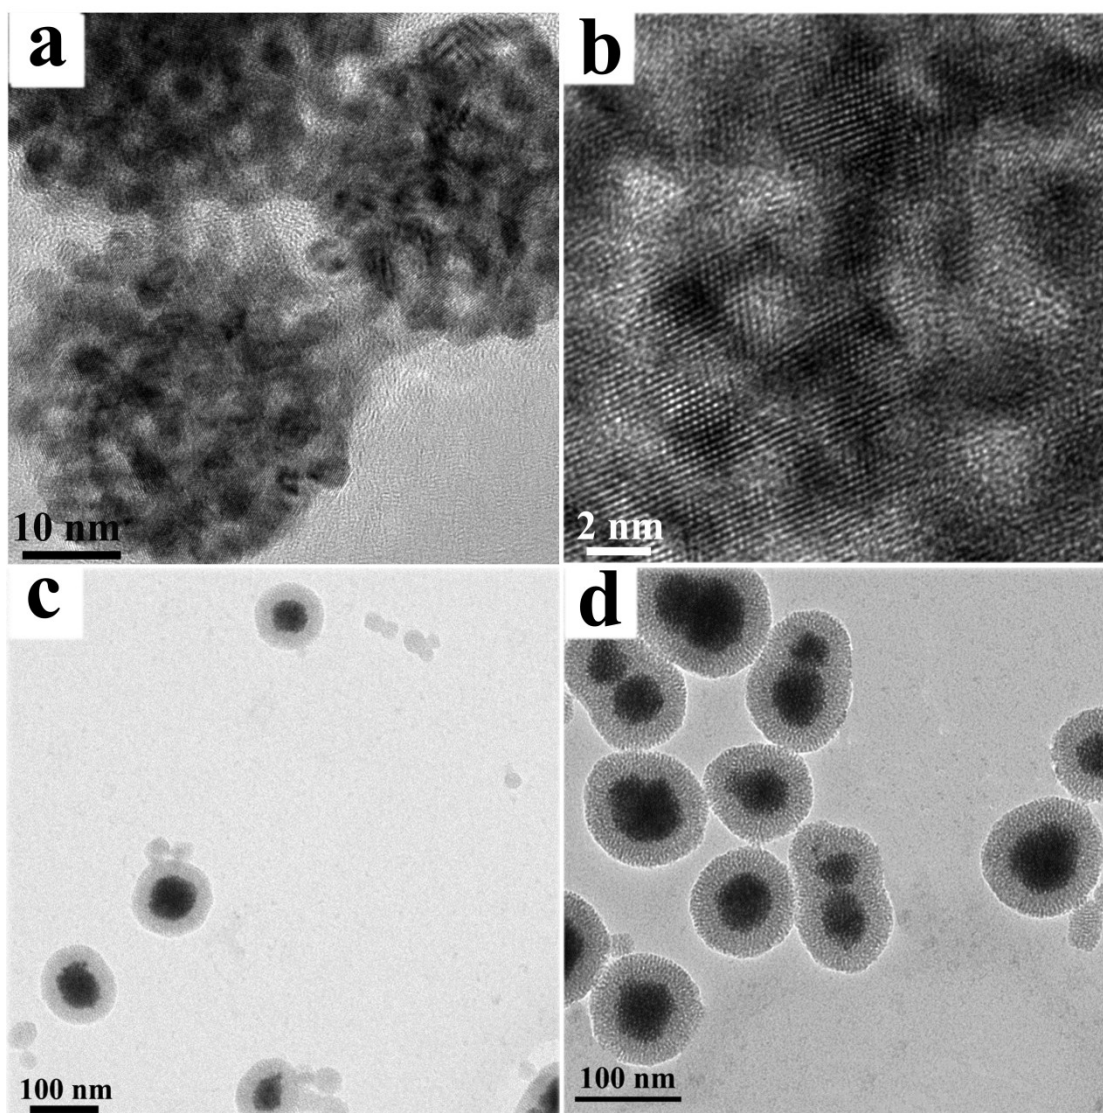

**Fig. S3.** High-resolution transmission electron microscope (HRTEM) images of mPt NPs (a and b); Transmission electron microscope (TEM) images of mPt@mSiO<sub>2</sub> (c) and mPt@mSiO<sub>2</sub>-GdDTPA (d).

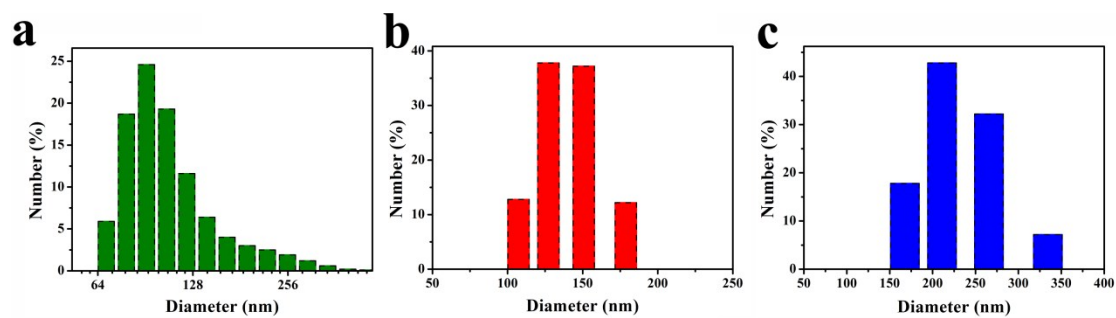

**Fig. S4.** Dynamic Light Scattering (DLS) of mPt in PBS (a) and mPt in water (b), and DLS of mPt@mSiO<sub>2</sub>-GdDTPA in water (c). The polydispersity index (PDI) of Fig. S4 a-c is 0.39, 0.14, and 0.09, respectively.

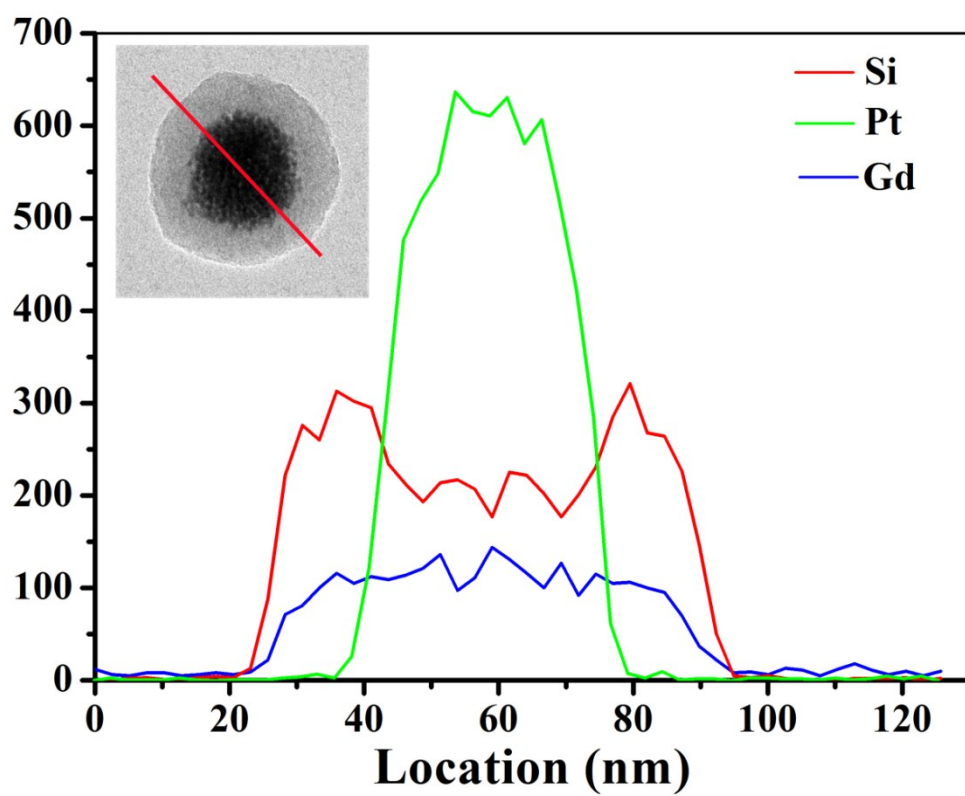

**Fig. S5.** The linear distribution of Si, Pt, and Gd elements in mPt@mSiO<sub>2</sub>-GdDTPA.

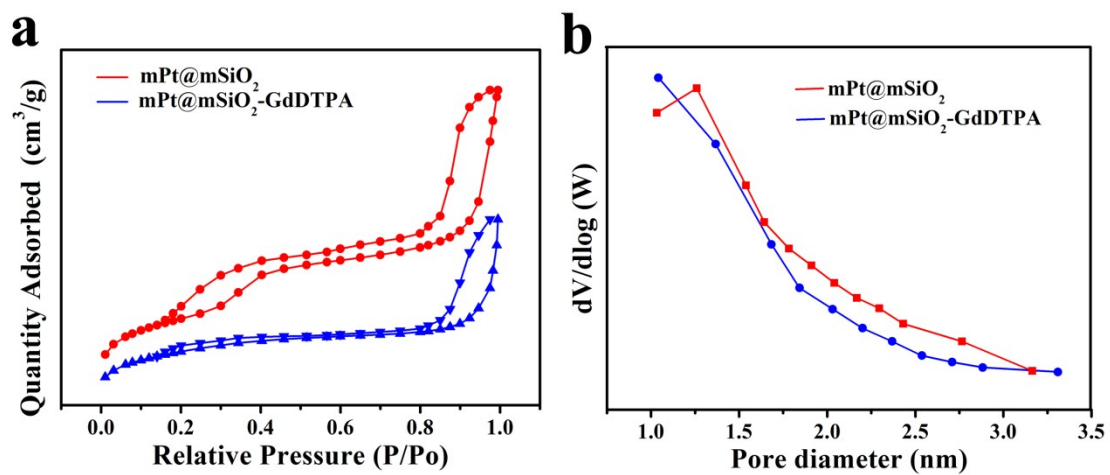

**Fig. S6.** N<sub>2</sub> adsorption/desorption isotherms of  $\text{mPt@mSiO}_2$  and  $\text{mPt@mSiO}_2\text{-GdDTPA}$  (a); Pore size distributions of  $\text{mPt@mSiO}_2$  and  $\text{mPt@mSiO}_2\text{-GdDTPA}$  (b).



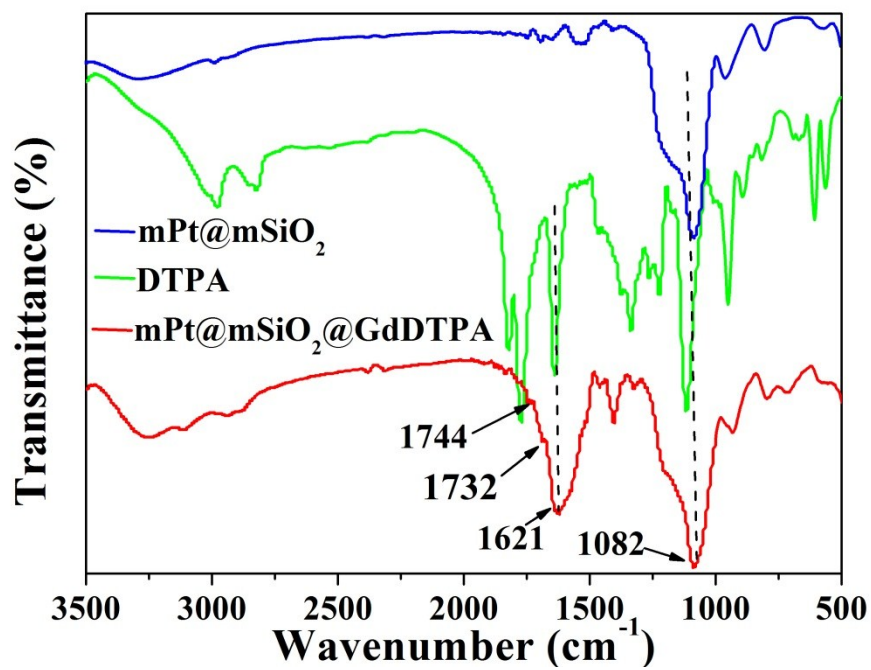

**Fig. S7.** FTIR spectra of mPt@mSiO<sub>2</sub>-GdDTPA, mPt@mSiO<sub>2</sub>, and DTPA.

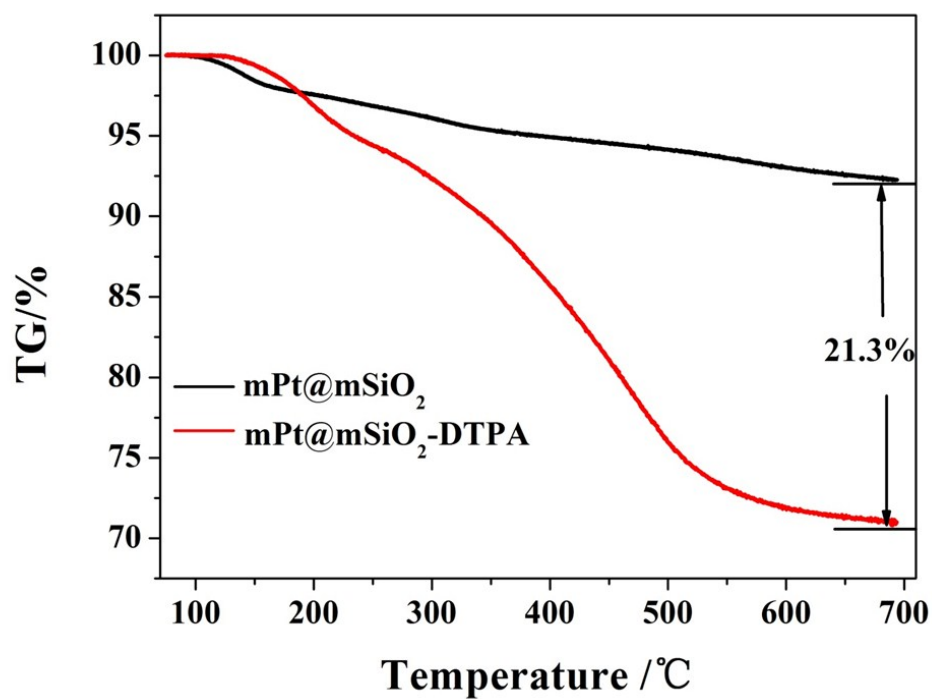

**Fig. S8.** The thermogravimetric curves of  $\text{mPt@mSiO}_2$  and  $\text{mPt@mSiO}_2\text{-DTPA}$ .

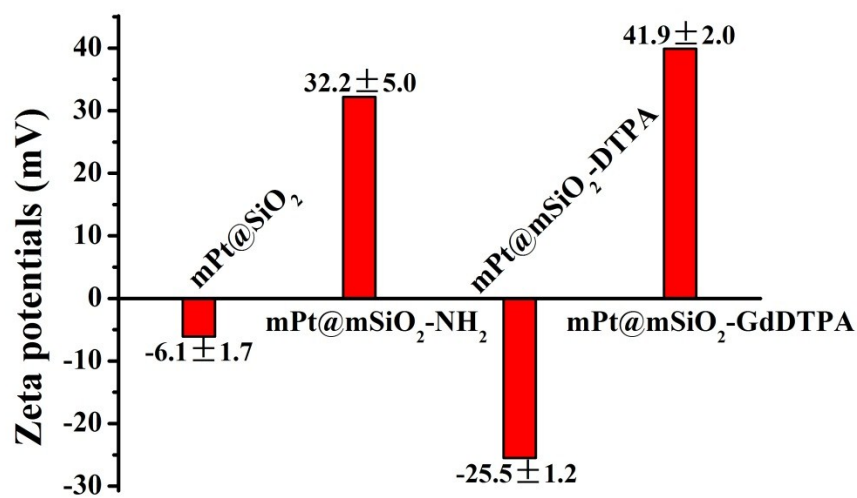

**Fig. S9.** The zeta potentials of mPt@SiO<sub>2</sub>, mPt@SiO<sub>2</sub>-NH<sub>2</sub>, mPt@SiO<sub>2</sub>-DTPA, and mPt@SiO<sub>2</sub>-GdDTPA.

**Table. S1.** The zeta potentials of mPt@SiO<sub>2</sub>, mPt@SiO<sub>2</sub>-NH<sub>2</sub>, mPt@SiO<sub>2</sub>-DTPA, and mPt@SiO<sub>2</sub>-GdDTPA in water.

| Sample                                | Zeta potential (mV) |
|---------------------------------------|---------------------|
| mPt@SiO <sub>2</sub>                  | -6.1 ± 1.7          |
| mPt@SiO <sub>2</sub> -NH <sub>2</sub> | 32.2 ± 5.0          |
| mPt@SiO <sub>2</sub> -DTPA            | -25.5 ± 1.2         |
| mPt@SiO <sub>2</sub> -GdDTPA          | 41.9 ± 2.0          |

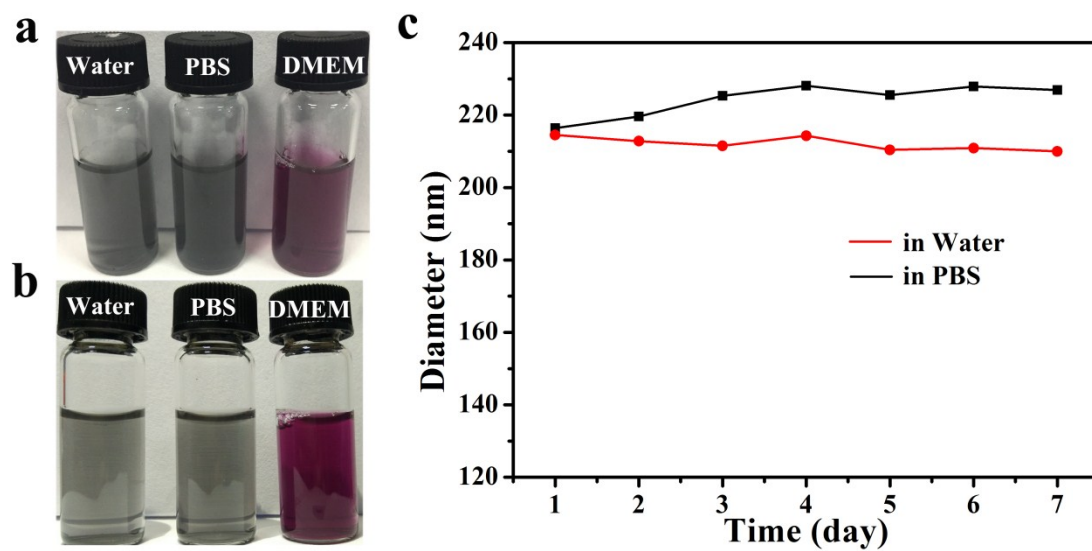

**Fig. S10.** The photos of mPt@mSiO<sub>2</sub>-GdDTPA in water, PBS (pH = 7.4) and DMEM culture solution (a), and after being placed in the lab at room temperature for one week (b), and the DLS sizes of mPt@mSiO<sub>2</sub>-GdDTPA during one week (c).

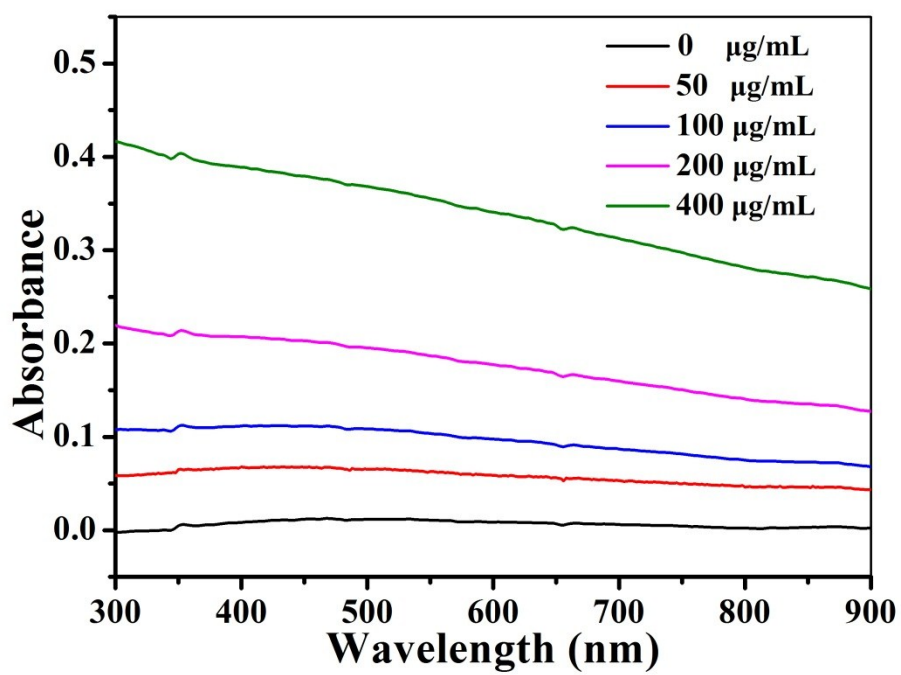

**Fig. S11.** UV-Vis-NIR absorption spectra of different concentrations of mPt@mSiO<sub>2</sub>-GdDTPA in water.

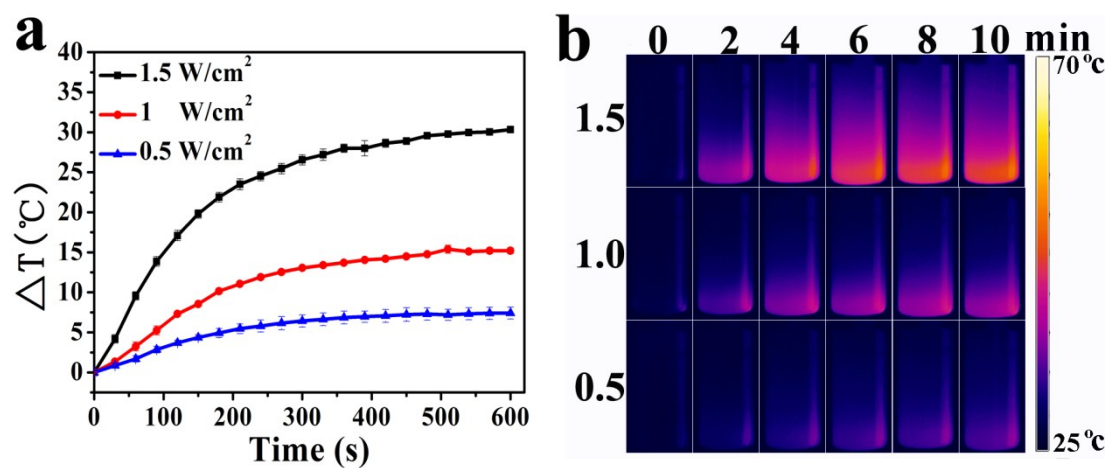

**Fig. S12.** Temperature changes (a) and infrared thermal images (b) of mPt@mSiO<sub>2</sub>-GdDTPA (400  $\mu$ g/mL) under 808 nm laser irradiation for 10 min with different power (1.5 W/cm<sup>2</sup>, 1 W/cm<sup>2</sup>, 0.5 W/cm<sup>2</sup>).

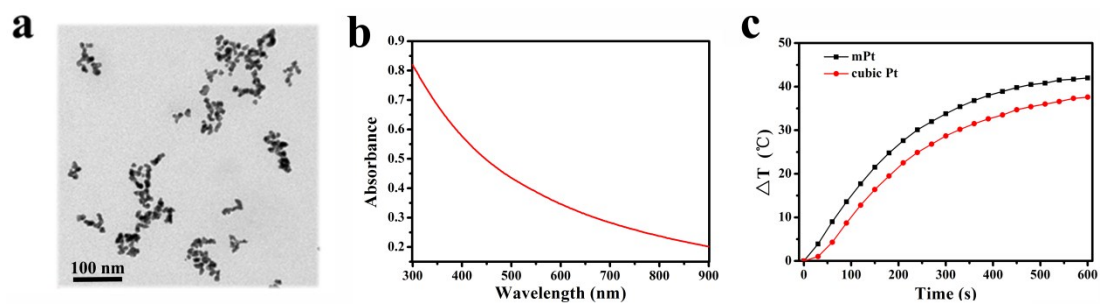

**Fig. S13.** Transmission electron microscope (TEM) image of cubic Pt NPs (a); UV-Vis-NIR absorption spectrum of cubic Pt NPs in water (b); Temperature changes of mPt NPs and cubic Pt NPs (60  $\mu\text{g/mL}$ ) under 808 nm laser irradiation for 10 min (1.5  $\text{W/cm}^2$ ) (c).



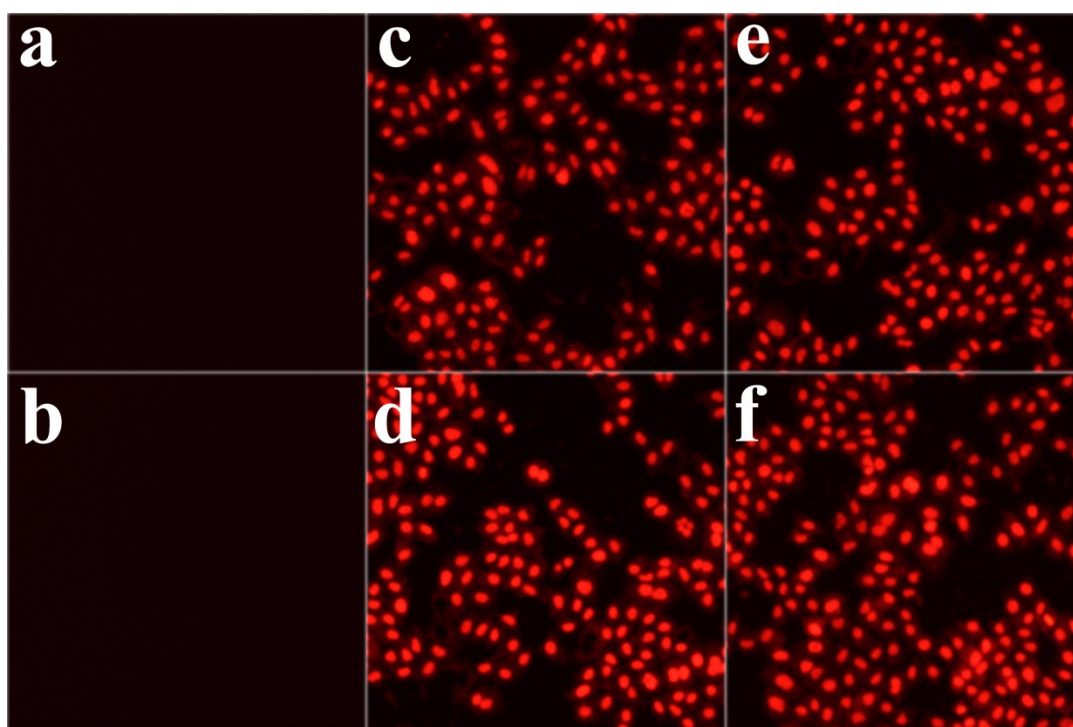

**Fig. S14.** Inverted fluorescence microscope of HeLa cells stained with PI based on laser illumination 808 nm laser; control group without laser (a), control group with laser ( $2 \text{ W/cm}^2$ , 15 min) (b), sample with  $1.5 \text{ W/cm}^2$  laser for 10 min (c), and 15 min (d), and sample with  $2 \text{ W/cm}^2$  laser for 10 min (e), and 15 min (f).

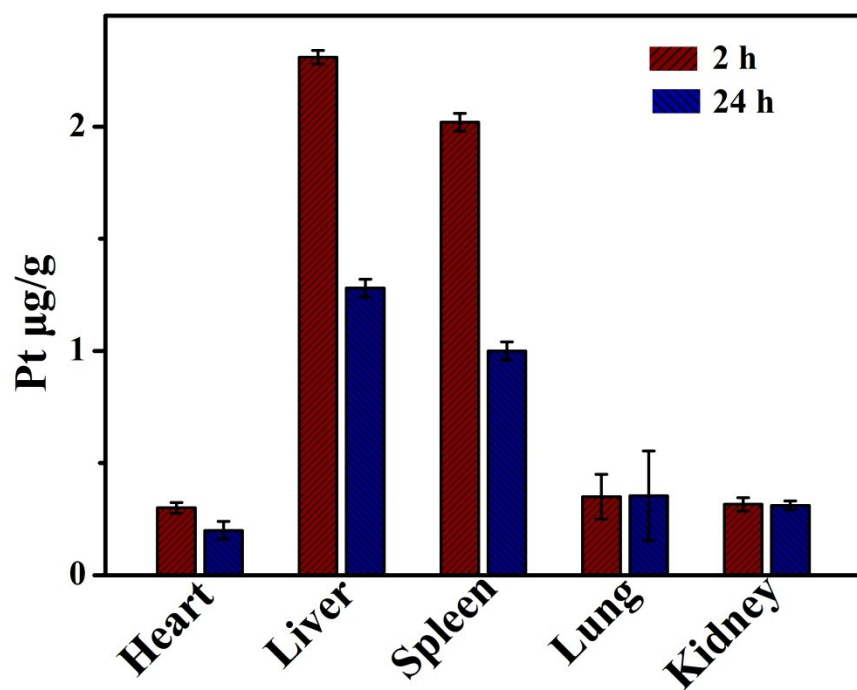

**Fig. S15.** Distributions of Pt in different organs of Kunming mice at 2 and 24 h post-injection of mPt@mSiO<sub>2</sub>-GdDTPA NPs (n = 3, dose = 3 mg/mL).

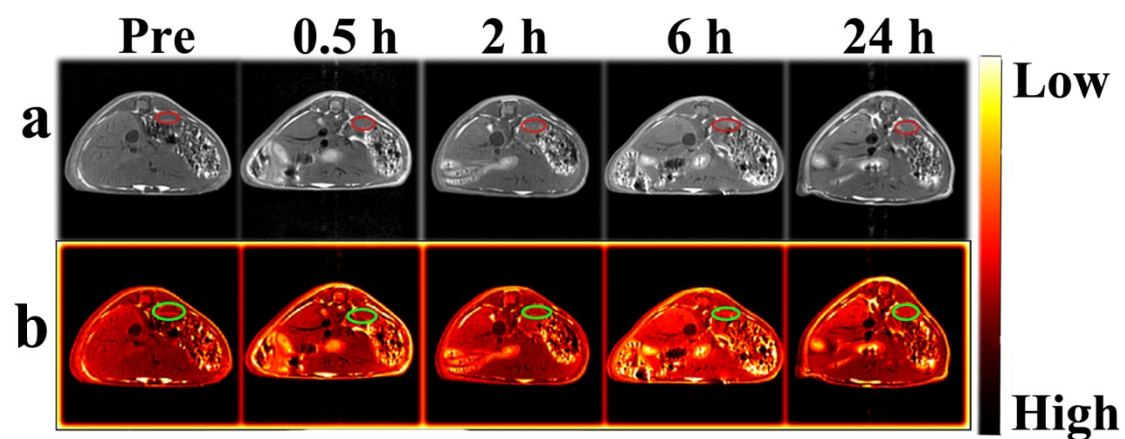

**Fig. S16.** *In vivo*  $T_1$ -weighted MR images of Kunming mice after the tail intravenous injection for varied time periods of spleen at the same dosage (3 mg/mL, 200  $\mu$ L). The coronal images (a) and color mapped images (b). The red and green circles represent the region of spleen.
